# Supplementary material for: Enhanced antibacterial effect of a novel Friunavirus phage vWU2001 in combination with colistin against carbapenem-resistant Acinetobacter baumannii
Source: PubMed Central journal article supplement (PMC8850435; doi:10.1038/s41598-022-06582-0), 2022-02-16
Supplement: 41598_2022_6582_MOESM1_ESM.pdf [file 41598_2022_6582_MOESM1_ESM.pdf]

**Enhanced antibacterial effect of a novel *Friunavirus* phage vWU2001 in combination with colistin against carbapenem-resistant *Acinetobacter baumannii***

Phitchayapak Wintachai<sup>1\*</sup>, Narumon Phaonakrop<sup>2</sup>, Sittiruk Roytrakul<sup>2</sup>, Ampapan Naknaen<sup>3</sup>, Rattanaruji Pomwised<sup>3</sup>, Supayang Piyawan Voravuthikunchai<sup>3,4</sup>, Komwit Surachat<sup>5</sup>, Duncan R Smith<sup>6</sup>

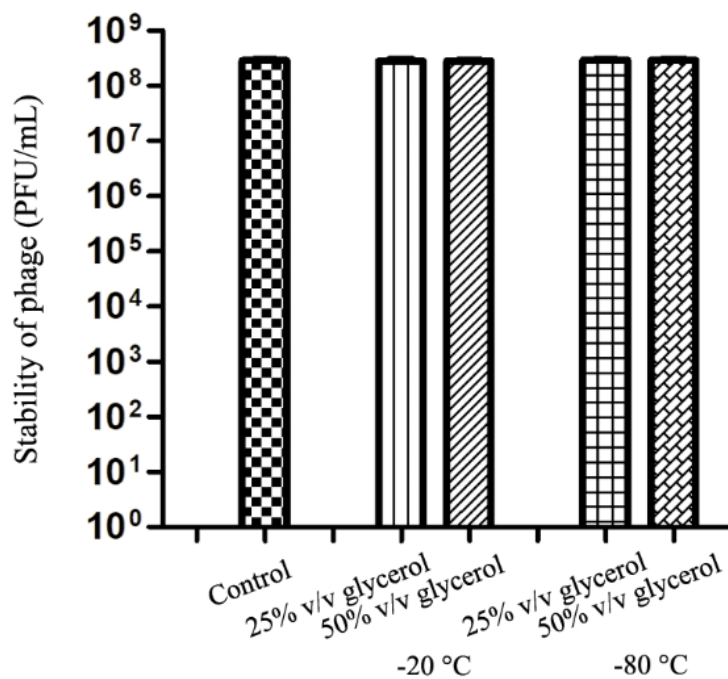

**Supplementary Figure S1.** Stability of phage vWU2001 in different concentrations of glycerol, a cryoprotective agent at -20 and -80 °C. Experiments were undertaken independently in duplicate with duplicate assay. The data show the mean±SD (\*, *P* value<0.05).

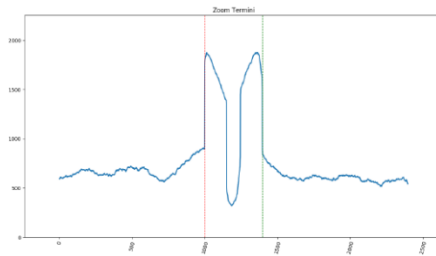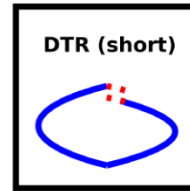

PhageTerm Method

| Ends      | Left (red) | Right (green) | Permuted | Orientation | Class       | Type |
|-----------|------------|---------------|----------|-------------|-------------|------|
| Redundant | 36729      | 37125         | No       | NA          | DTR (short) | T7   |

*\*Direct Terminal Repeats: 397 bp*

**Supplementary Figure S2.** PhageTerm analysis of phage vWU2001

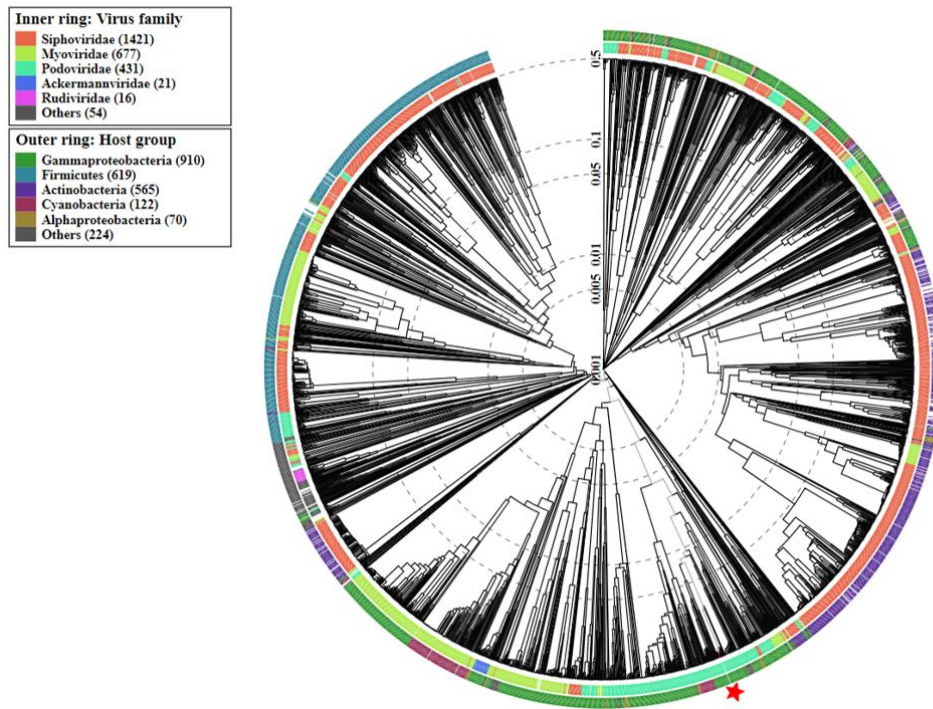

**Supplementary Figure S3.** Phage phylogenetic tree. Protein-level phylogenetic tree, generated by VIPtree using a protein distance metric based on normalized tBLASTx scores plotted on a log scale. The tree included 2688 phages. Phage vWU2001 was highlighted with a red star.

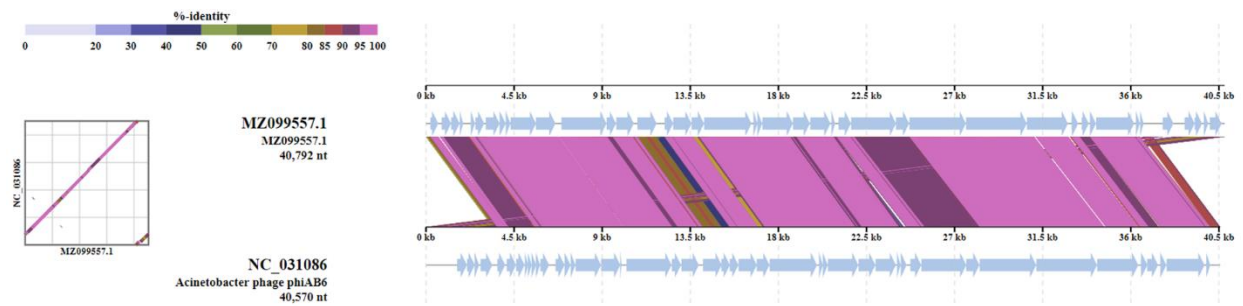

**Supplementary Figure S4.** Genome alignment of phage vWU2001 and *Acinetobacter* phage phiAB6, generated by VIPtree. All tBLASTx alignments are represented by colored lines between two genomes. Color scale represents The tBLASTx percent identity was presented by color scales.
